# Supplementary material
Source: PubMed Central journal article supplement (PMC3262676)
Supplement: NIHMS331524-supplement-supplement_1.pdf [file NIHMS331524-supplement-supplement_1.pdf]

**Supplementary Tables Online**

Table O1  
Effects of Smoking Participation and Number of Cigarettes during  
Pregnancy on the Probability of High Neurodevelopment Risk Status<sup>a</sup> with  
Non-clustered Standard Errors

| Model                                 | Total Sample         | Low<br>Socioeconomic<br>Status | High<br>Socioeconomic:<br>status |
|---------------------------------------|----------------------|--------------------------------|----------------------------------|
| Smoking participation                 |                      |                                |                                  |
| Probit                                | 0.072**<br>(0.035)   | 0.075*<br>(0.044)              | 0.089<br>(0.064)                 |
| Bivariate Probit                      | 0.401**<br>(0.15)    | 0.544***<br>(0.123)            | 0.283<br>(0.328)                 |
| F-statistic                           | 15.8***<br>[2, 1569] | 10.18***<br>[2, 783]           | 9.2***<br>[2, 771]               |
| Over-identification<br>Chi-square [1] | 1.61                 | 1.57                           | 1.43                             |
| Exogeneity Chi-<br>square [1]         | 4.1**                | 6.19**                         | 0.43                             |
| Cigarettes                            |                      |                                |                                  |
| Probit                                | 0.006**<br>(0.003)   | 0.007*<br>(0.004)              | 0.007<br>(0.007)                 |
| IV Probit                             | 0.032**<br>(0.015)   | 0.035**<br>(0.016)             | -                                |
| F-statistic [df]                      | 32.4***<br>[2, 1569] | 19.72***<br>[2, 783]           | -                                |
| Over-identification<br>Chi-square [1] | 0.09                 | 0.19                           | -                                |
| Exogeneity Chi-<br>square [1]         | 3.13*                | 3.28                           |                                  |

Note: Non-clustered standard errors of effects are in parentheses. \*, \*\* and \*\*\* indicate p < 0.1, < 0.05 and < 0.01, respectively.

<sup>a</sup> Derived from the Bayley Infant Neurodevelopment Screener. Copyright © 2004. Harcourt Assessment Inc. Used with Permission. All rights Reserved.

Table O2  
Effects of Smoking and Number of Cigarettes during Pregnancy on the  
Child Neurodevelopment Rate<sup>a</sup> with Non-clustered Standard Errors

| Model                                 | Total Sample          | Low<br>Socioeconomic<br>Status | High<br>Socioeconomic<br>status |
|---------------------------------------|-----------------------|--------------------------------|---------------------------------|
| Smoking participation                 |                       |                                |                                 |
| OLS                                   | -2.85**<br>(1.17)     | -3.39**<br>(1.46)              | -1.60<br>(2.03)                 |
| 2SLS                                  | -29.85***<br>(9.61)   | -37.27***<br>(11.81)           | -11.91<br>(13.45)               |
| F-statistic [df]                      | 15.79***<br>[2, 1569] | 10.18**<br>[2, 783]            | 9.2***<br>[2, 771]              |
| Over-identification<br>Chi-square [1] | 1.02                  | 0.04                           | 0.2                             |
| Exogeneity F-<br>statistic [df]       | 10.77***<br>[1, 1569] | 14.22***<br>[1, 783]           | 0.62<br>[1, 771]                |
| Cigarettes                            |                       |                                |                                 |
| OLS                                   | -0.25**<br>(0.12)     | -0.26*<br>(0.14)               | -0.22<br>(0.28)                 |
| 2SLS                                  | -2.48***<br>(0.67)    | -2.49**<br>(0.72)              | -                               |
| Instrument F-statistic<br>[df]        | 32.35***<br>[2, 1569] | 19.72***<br>[2, 783]           | -                               |
| Over-identification<br>Chi-square [1] | 0.83                  | 0.36                           | -                               |
| Exogeneity F-<br>statistic [df]       | 14.14***<br>[1, 1569] | 13.21**<br>[1, 783]            | -                               |

Note: Non-clustered standard errors of effects are in parentheses. \*, \*\* and \*\*\* indicate p < 0.1, < 0.05 and < 0.01, respectively.

<sup>a</sup> Derived from the Bayley Infant Neurodevelopment Screener. Copyright © 2004. Harcourt Assessment Inc. Used with Permission. All rights Reserved.
